# Supplementary material
Source: PubMed Central journal article supplement (PMC9093100)
Supplement: jvi.00296-22-s0001.pdf [file jvi.00296-22-s0001.pdf]

Supplementary Table S1 Sequence information of the viruses used in phylogenetic trees and multiple alignments.

| Virus information used for phylogenetic tree and RdRp multiple sequence alignment |              |                  |               |                        |                           |  |
|-----------------------------------------------------------------------------------|--------------|------------------|---------------|------------------------|---------------------------|--|
| Virus name                                                                        | Abbreviation | Accession number | Host          | Family                 | Genus                     |  |
| Atlantic salmon calicivirus                                                       | ASCV         | NC_024031        | vertebrates   | <i>Caliciviridae</i>   | <i>Salivirus</i>          |  |
| Calicivirus                                                                       | CCV          | HQ010042         | vertebrates   | <i>Caliciviridae</i>   | <i>Bavovirus</i>          |  |
| Calicivirus                                                                       | CV-AB90      | NC_012699        | vertebrates   | <i>Caliciviridae</i>   | <i>Valovirus</i>          |  |
| Calicivirus strain NB                                                             | N1V          | NC_004064        | vertebrates   | <i>Caliciviridae</i>   | <i>Nebovirus</i>          |  |
| Fathead minnow calicivirus                                                        | FMCV         | NC_035675        | vertebrates   | <i>Caliciviridae</i>   | <i>Minovirus</i>          |  |
| Norovirus GI                                                                      | NV           | NC_001959        | vertebrates   | <i>Caliciviridae</i>   | <i>Norovirus</i>          |  |
| Rabbit hemorrhagic disease virus                                                  | RHDV         | NC_001543        | vertebrates   | <i>Caliciviridae</i>   | <i>Lagovirus</i>          |  |
| Sapovirus                                                                         | SV           | NC_006269        | vertebrates   | <i>Caliciviridae</i>   | <i>Sapovirus</i>          |  |
| Tulane virus                                                                      | TV           | EU391643         | vertebrates   | <i>Caliciviridae</i>   | <i>Recovirus</i>          |  |
| Turkey calicivirus                                                                | TCV          | JQ347522         | vertebrates   | <i>Caliciviridae</i>   | <i>Nacovirus</i>          |  |
| Vesicular exanthema of swine virus                                                | VESV         | NC_002551        | vertebrates   | <i>Caliciviridae</i>   | <i>Vesivirus</i>          |  |
| Acute bee paralysis virus                                                         | ABPV         | NC_002548        | invertebrates | <i>Dicistroviridae</i> | <i>Aparavirus</i>         |  |
| Cricket paralysis virus                                                           | CrPV         | NC_003924        | invertebrates | <i>Dicistroviridae</i> | <i>Cripavirus</i>         |  |
| Triatoma virus                                                                    | TrV          | NC_003783        | invertebrates | <i>Dicistroviridae</i> | <i>Triatovirus</i>        |  |
| Infectious flacherie virus                                                        | IFV          | NC_003781        | invertebrates | <i>Iflaviridae</i>     | <i>Iflavirus</i>          |  |
| Asterionellopsis glacialis RNA virus                                              | AglaRNAV     | NC_024489        | algae         | <i>Marnaviridae</i>    | <i>Kusarnavirus</i>       |  |
| Aurantiochytrium single-stranded RNA virus 01                                     | ASSRNAV01    | NC_007522        | algae         | <i>Marnaviridae</i>    | <i>Labymavirus</i>        |  |
| Chaetoceros tenuissimus RNA virus type-II                                         | CtenRNAVII   | NC_025889        | algae         | <i>Marnaviridae</i>    | <i>Sogarnavirus</i>       |  |
| Heterosigma akashiwo RNA virus                                                    | HaRNAV       | NC_005281        | algae         | <i>Marnaviridae</i>    | <i>Marnavirus</i>         |  |
| Marine RNA virus BC-4                                                             | BC-4         | MH171300         | marine (S)    | <i>Marnaviridae</i>    | <i>Salishamavirus</i>     |  |
| Marine RNA virus JP-B                                                             | JP-B         | NC_009758        | marine (S)    | <i>Marnaviridae</i>    | <i>Locarnavirus</i>       |  |
| Rhizosolenia setigera RNA virus 01                                                | RsRNAV01     | NC_018613        | algae         | <i>Marnaviridae</i>    | <i>Bacillamavirus</i>     |  |
| Bluegill picornavirus                                                             | BGPV         | NC_018506        | vertebrates   | <i>Picornaviridae</i>  | <i>Limnipivirus</i>       |  |
| Bovine picornavirus                                                               | BoPV         | NC_026249        | vertebrates   | <i>Picornaviridae</i>  | <i>Bopivirus</i>          |  |
| Canine picodistovirus                                                             | CaPd         | NC_021178        | vertebrates   | <i>Picornaviridae</i>  | <i>Dicpivirus</i>         |  |
| Chicken orivirus 1                                                                | ChOV         | NC_025432        | vertebrates   | <i>Picornaviridae</i>  | <i>Orivirus</i>           |  |
| Crohivirus B                                                                      | BCrV         | NC_033819        | vertebrates   | <i>Picornaviridae</i>  | <i>Crohivirus</i>         |  |
| Duck aalivirus 1                                                                  | DAV          | NC_023985        | vertebrates   | <i>Picornaviridae</i>  | <i>Aalivirus</i>          |  |
| Duck hepatitis A virus 1                                                          | DHAV         | NC_008250        | vertebrates   | <i>Picornaviridae</i>  | <i>Avihepatovirus</i>     |  |
| Eel picornavirus 1                                                                | EPV          | NC_022332        | vertebrates   | <i>Picornaviridae</i>  | <i>Potampivirus</i>       |  |
| Enterovirus C                                                                     | PV-1         | NC_002058        | vertebrates   | <i>Picornaviridae</i>  | <i>Enterovirus</i>        |  |
| Falcovirus A1                                                                     | FaV          | NC_026921        | vertebrates   | <i>Picornaviridae</i>  | <i>Harkavirus</i>         |  |
| Foot-and-mouth disease virus - type O                                             | FMDV-O       | NC_039210        | vertebrates   | <i>Picornaviridae</i>  | <i>Aphthovirus</i>        |  |
| Hepatovirus A                                                                     | HAV          | NC_001489        | vertebrates   | <i>Picornaviridae</i>  | <i>Hepatovirus</i>        |  |
| Human parechovirus 1                                                              | HPeV         | NC_038319        | vertebrates   | <i>Picornaviridae</i>  | <i>Parechovirus</i>       |  |
| Porcine sapelovirus 1                                                             | PSV          | NC_003987        | vertebrates   | <i>Picornaviridae</i>  | <i>Sapelovirus</i>        |  |
| Seal picornavirus type 1                                                          | SPV          | NC_009891        | vertebrates   | <i>Picornaviridae</i>  | <i>Aquamavirus</i>        |  |
| Senecavirus A                                                                     | SVV          | NC_011349        | vertebrates   | <i>Picornaviridae</i>  | <i>Senecavirus</i>        |  |
| Shanbavirus A                                                                     | BShV         | NC_038961        | vertebrates   | <i>Picornaviridae</i>  | <i>Shanbavirus</i>        |  |
| Tortoise picornavirus                                                             | ToPV         | NC_025890        | vertebrates   | <i>Picornaviridae</i>  | <i>Torchivirus</i>        |  |
| Tremovirus A                                                                      | AEV          | NC_003990        | vertebrates   | <i>Picornaviridae</i>  | <i>Tremovirus</i>         |  |
| Turkey avisivirus                                                                 | AsV-A        | NC_038304        | vertebrates   | <i>Picornaviridae</i>  | <i>Avisivirus</i>         |  |
| Turkey gallivirus                                                                 | GV-A         | NC_018400        | vertebrates   | <i>Picornaviridae</i>  | <i>Gallivirus</i>         |  |
| Chironomus riparius                                                               | ChriV1       | KA182589         | invertebrates | <i>Polycipiviridae</i> | <i>Chipolycivirus</i>     |  |
| Hubei picorna-like virus 81                                                       | HpIV81       | NC_033152        | invertebrates | <i>Polycipiviridae</i> | <i>Hupolycivirus</i>      |  |
| Solenopsis invicta virus 2                                                        | SINV2        | NC_039236        | invertebrates | <i>Polycipiviridae</i> | <i>Sopolycivirus</i>      |  |
| Broad bean wilt virus 1                                                           | BBWV1        | NC_005289        | plants        | <i>Secoviridae</i>     | <i>Fabavirus</i>          |  |
| Cherry rasp leaf virus                                                            | CRLV         | NC_006271        | plants        | <i>Secoviridae</i>     | <i>Cheravirus</i>         |  |
| Cowpea mosaic virus                                                               | CPMV         | NC_003549        | plants        | <i>Secoviridae</i>     | <i>Cemovirus</i>          |  |
| Parsnip yellow fleck virus                                                        | PYFV         | NC_003628        | plants        | <i>Secoviridae</i>     | <i>Sequivirus</i>         |  |
| Rice tungro spherical virus                                                       | RTSV         | NC_001632        | plants        | <i>Secoviridae</i>     | <i>Walkavirus</i>         |  |
| Satsuma dwarf virus                                                               | SDV          | NC_003785        | plants        | <i>Secoviridae</i>     | <i>Sadwavirus</i>         |  |
| Tobacco ringspot virus                                                            | TRSV         | NC_005097        | plants        | <i>Secoviridae</i>     | <i>Nepovirus</i>          |  |
| Tomato torrado virus                                                              | ToTV         | NC_009013        | plants        | <i>Secoviridae</i>     | <i>Torradovirus</i>       |  |
| Aspergillus foetidus slow virus 2                                                 | AFV-S2       | HE588148         | fungi         | <i>Yadokariviridae</i> | <i>Betayadokarivirus</i>  |  |
| Aspergillus homomorphus yadokarivirus 1                                           | AhoYV1       | MK279487         | fungi         | <i>Yadokariviridae</i> | <i>Betayadokarivirus</i>  |  |
| Fusarium poae mycovirus 2                                                         | FpMyV2       | NC_030870        | fungi         | <i>Yadokariviridae</i> | <i>Alphayadokarivirus</i> |  |
| Penicillium aurantiogriseum foetidus-like virus                                   | PaFIV1       | NC_028468        | fungi         | <i>Yadokariviridae</i> | <i>Betayadokarivirus</i>  |  |
| Penicillium digitatum yadokarivirus 1                                             | PdYV1        | MK279488         | fungi         | <i>Yadokariviridae</i> | <i>Betayadokarivirus</i>  |  |
| Picoa juniperi yado-kari virus 1                                                  | PjYV1        | MT876192         | fungi         | <i>Yadokariviridae</i> | <i>Betayadokarivirus</i>  |  |
| Plasmopara viticola lesion associated yadokari virus 1                            | PvLaYkV1     | MN551121         | fungi         | <i>Yadokariviridae</i> | <i>Betayadokarivirus</i>  |  |
| Rhizoctonia solani mycovirus 1                                                    | RsMV-1       | KX349063         | fungi         | <i>Yadokariviridae</i> | <i>Betayadokarivirus</i>  |  |
| SsYkV1                                                                            | SsYkV1       | MZ867703         | fungi         | <i>Yadokariviridae</i> | <i>Alphayadokarivirus</i> |  |
| Yado-kari virus 1                                                                 | RnYkV1       | NC_040360        | fungi         | <i>Yadokariviridae</i> | <i>Betayadokarivirus</i>  |  |
| Yado-kari virus 2                                                                 | RnYkV2       | LC333755         | fungi         | <i>Yadokariviridae</i> | <i>Alphayadokarivirus</i> |  |
| Yado-kari virus 3                                                                 | RnYkV3       | LC333757         | fungi         | <i>Yadokariviridae</i> | <i>Alphayadokarivirus</i> |  |
| Yado-kari virus 4                                                                 | RnYkV4       | LC333741         | fungi         | <i>Yadokariviridae</i> | <i>Alphayadokarivirus</i> |  |
| Virus information used for 2A-like motif multiple sequence alignment              |              |                  |               |                        |                           |  |
| SsYkV1                                                                            | SsYkV1       | MZ867703         | fungi         | <i>Yadokariviridae</i> | <i>Alphayadokarivirus</i> |  |
| Fusarium poae mycovirus 2                                                         | FpMyV2       | NC_030870        | fungi         | <i>Yadokariviridae</i> | <i>Alphayadokarivirus</i> |  |
| Yado-kari virus 2                                                                 | RnYkV2       | LC333755         | fungi         | <i>Yadokariviridae</i> | <i>Alphayadokarivirus</i> |  |
| Yado-kari virus 3                                                                 | RnYkV3       | LC333757         | fungi         | <i>Yadokariviridae</i> | <i>Alphayadokarivirus</i> |  |
| Aspergillus foetidus slow virus 2                                                 | AFV-S2       | HE588148         | fungi         | <i>Yadokariviridae</i> | <i>Betayadokarivirus</i>  |  |
| Penicillium aurantiogriseum foetidus-like virus                                   | PaFIV1       | NC_028468        | fungi         | <i>Yadokariviridae</i> | <i>Betayadokarivirus</i>  |  |
| Aspergillus homomorphus yadokarivirus 1                                           | AhoYV1       | MK279487         | fungi         | <i>Yadokariviridae</i> | <i>Betayadokarivirus</i>  |  |
| Yado-kari virus 1                                                                 | RnYkV1       | NC_040360        | fungi         | <i>Yadokariviridae</i> | <i>Betayadokarivirus</i>  |  |
| Penicillium digitatum yadokarivirus 1                                             | PdYV1        | MK279488         | fungi         | <i>Yadokariviridae</i> | <i>Betayadokarivirus</i>  |  |
| Rhizoctonia solani mycovirus 1                                                    | RsMV-1       | KX349063         | fungi         | <i>Yadokariviridae</i> | <i>Betayadokarivirus</i>  |  |
| Picoa juniperi yado-kari virus 1                                                  | PjYV1        | MT876192         | fungi         | <i>Yadokariviridae</i> | <i>Betayadokarivirus</i>  |  |
| Plasmopara viticola lesion associated yadokari virus 1                            | PvLaYkV1     | MN551121         | fungi         | <i>Yadokariviridae</i> | <i>Betayadokarivirus</i>  |  |
| Foot-and-mouth disease virus - type O                                             | FMDV-O       | NC_039210        | vertebrates   | <i>Picornaviridae</i>  | <i>Aphthovirus</i>        |  |
| Equine rhinitis A virus                                                           | ERAV         | L43052           | vertebrates   | <i>Picornaviridae</i>  | <i>Aphthovirus</i>        |  |
| Ectropis obliqua picorna-like virus                                               | EoPV(2A1)    | AY341824         | invertebrates | <i>Iflaviridae</i>     | <i>Iflavirus</i>          |  |
| Ectropis obliqua picorna-like virus                                               | EoPV(2A2)    | AY341824         | invertebrates | <i>Iflaviridae</i>     | <i>Iflavirus</i>          |  |

| Virus name                                  | Abbreviation | Accession number | Host          | Family            | Genus                       |
|---------------------------------------------|--------------|------------------|---------------|-------------------|-----------------------------|
| Cricket paralysis virus                     | CrPV         | NC_003924        | invertebrates | Dicistroviridae   | <i>Cripavirus</i>           |
| Providence virus                            | PrV(2A1)     | GU991616         | invertebrates | Carmotetraviridae | <i>Alphacarmotetravirus</i> |
| Providence virus                            | PrV(2A2)     | GU991616         | invertebrates | Carmotetraviridae | <i>Alphacarmotetravirus</i> |
| Dendrolimus punctatus cypovirus 1           | DpCPV1       | AY185594         | invertebrates | Reoviridae        | <i>Cypovirus</i>            |
| Lymantria dispar cypovirus 1                | LdCPV1       | AF389466         | invertebrates | Reoviridae        | <i>Cypovirus</i>            |
| Bombyx mori cypovirus 1                     | BmCPV1       | AF433660         | invertebrates | Reoviridae        | <i>Cypovirus</i>            |
| Penaeid shrimp infectious myonecrosis virus | IMNV(2A1)    | EF061744         | invertebrates | Totiviridae       |                             |
| Penaeid shrimp infectious myonecrosis virus | IMNV(2A2)    | EF061744         | invertebrates | Totiviridae       |                             |
| Armigeres subalbatus virus SaX06-AK20       | AsTV         | ACH85915         | invertebrates | Totiviridae       |                             |

















**Supplementary Table S3 The *S. sclerotiorum* strains and their related mycoviruses were used in this study.**

| Strain                            | Virulence | SsYkV1 | SsBV3 | SsBV1 | SsDFV1 | SsDFV3 | SsReV1 |
|-----------------------------------|-----------|--------|-------|-------|--------|--------|--------|
| SCH941                            | weak      | ✓      | ✓     | ✓     | ✓      | ✓      | ✓      |
| SCH941R6                          | strong    | ✓      | ✓     | ✓     | ✓      | ✓      | -      |
| SCH941R115                        | strong    | ✓      | ✓     | ✓     | -      | -      | -      |
| AT3, AT4, AT5, AT6                | strong    | ✓      | ✓     | -     | -      | -      | -      |
| PT18, PT19                        | strong    | -      | ✓     | -     | -      | -      | -      |
| SCH941R117                        | strong    | -      | -     | -     | -      | -      | ✓      |
| SCH941A1, SCH941A1 <sup>hyg</sup> | strong    | -      | -     | -     | -      | -      | -      |

Note: The symbol "✓" indicates that the virus was detected in the strain, the symbol "-" indicates that the virus was not detected in the strain.

### Supplementary Table S4 List of primers used in this study.

| The primers for detection of six mycoviruses in strain SCH941 |                         |                   |
|---------------------------------------------------------------|-------------------------|-------------------|
| Primer Name                                                   | Primer Sequence(5'-3')  | Product size (bp) |
| SsYkV1-F                                                      | GACATTGATCAAGCGACGGC    | 837               |
| SsYkV1-R                                                      | TGCATATGCGAATTTGCCCG    |                   |
| SsBV1-S1-F                                                    | AGAGTCCTTCCACGCTGTTG    | 863               |
| SsBV1-S1-R                                                    | TGCGCTCTACCTCCTTACCT    |                   |
| SsBV1-S2-F                                                    | TGACCTCCGGTATTGCCAAC    | 770               |
| SsBV1-S2-R                                                    | GTCGCGAAGAGACTCGTAGG    |                   |
| SsBV3-S1-F                                                    | ACCTAAAGGTGCTGACGAGC    | 692               |
| SsBV3-S1-R                                                    | TCATGCCAAAAGGCACGTTG    |                   |
| SsBV3-S2-F                                                    | CGCTTATGGCAAAGATGGGC    | 915               |
| SsBV3-S2-R                                                    | GCTGCGCGTTATGTAGTTGG    |                   |
| SsReV1-S2-F                                                   | TGCCATTGAGTCCGTTTCGC    | 649               |
| SsReV1-S2-R                                                   | CGTTTGGACGGCAGTTGAATG   |                   |
| SsDFV1-F                                                      | GCTGGAGGTTCCGCTTTCT     | 538               |
| SsDFV1-R                                                      | CGATACTTTGCTGTAGGGTCTTC |                   |
| SsDFV3-F                                                      | CACGCCAACTAAACAGGACG    | 484               |
| SsDFV3-R                                                      | GCACATGACGAGCAAGGGTAT   |                   |

  

| The primers for detection of SsYkV1 circular genome |                      |                   |
|-----------------------------------------------------|----------------------|-------------------|
| Primer Name                                         | Primer               | Product size (bp) |
| SsYkV1-circular-F                                   | TGTCACCAGCGTCCAGAAGT | 1029              |
| SsYkV1-circular-R                                   | TCGTCCTGTTTCCAGTCCGT |                   |
| SsYkV1-linear-F                                     | TCACCGCCAAGAAGAAGCA  | 430               |
| SsYkV1-linear-R                                     | AAGGGGTCAGTAGCCGAATT |                   |

  

| The primers for confirmation viral linear and circular genome of SsYkV1 |                         |                   |
|-------------------------------------------------------------------------|-------------------------|-------------------|
| Primer Name                                                             | Primer Sequence(5'-3')  | Product size (bp) |
| SsYkV1-qCF                                                              | GAACCAAGTGTTAATTGATAG   | 203               |
| SsYkV1-qCR                                                              | TTACCGTCTAACCATAACC     |                   |
| SsYkV1-qLF                                                              | CTCTACATAAGCGATTAC      | 142               |
| SsYkV1-qLR                                                              | CTAACTCTCTGGATACTT      |                   |
| Ss-Actin-qF                                                             | GCTTGGAGAAGTCATACG      | 144               |
| Ss-Actin-qR                                                             | TGATGGAGTTGAAGGTAGT     |                   |
| Ss-Actin-F                                                              | CTGGAAGATTGACTGGCGGTTTG | 419               |
| Ss-Actin-R                                                              | AGCACCAGAGGAGCACCCAGTTT |                   |
